# Supplementary material
Source: PubMed Central journal article supplement (PMC7424532)
Supplement: NIHMS1611301-supplement-Supp_Info.pdf [file NIHMS1611301-supplement-Supp_Info.pdf]

1 **Supporting Information for**

2

3 Evaluation of the colloidal stability and adsorption performance of

4 reduced graphene oxide–elemental silver/magnetite nanohybrids for

5 selected toxic heavy metals in aqueous solutions

6

7 Chang Min Park<sup>a,b\*</sup>, Dengjun Wang<sup>b</sup>, Jonghun Han<sup>c</sup>, Jiyong Heo<sup>c</sup>, Chunming Su<sup>d,\*\*</sup>

8

9 *<sup>a</sup>Department of Environmental Engineering, Kyungpook National University, 80 Daehak-ro,*

10 *Buk-gu, Daegu, 41566, South Korea*

11 *<sup>b</sup>National Research Council Resident Research Associate at the U.S. Environmental Protection*

12 *Agency, 919 Kerr Research Drive, Ada, OK 74820, USA*

13 *<sup>c</sup>Department of Civil and Environmental Engineering, Korea Army Academy at Youngcheon, 495*

14 *Hogook-ro, Gokyeongmeon, Youngcheon, Gyeongbuk 38900, South Korea*

15 *<sup>d</sup>Groundwater, Watershed, and Ecosystem Restoration Division, National Risk Management*

16 *Research Laboratory, Office of Research and Development, U.S. Environmental Protection*

17 *Agency, 919 Kerr Research Drive, Ada, OK 74820, USA*

18

19 *\*Corresponding author. phone: +82-53-950-6581; fax: +82-53-950-6579;*

20 *e-mail: [cmpark@knu.ac.kr](mailto:cmpark@knu.ac.kr) (C.M. Park)*

21 *\*\*Corresponding author. phone: +1-580-436-8638; fax: +1-580-436-8703;*

22 *e-mail: [su.chunming@epa.gov](mailto:su.chunming@epa.gov) (C. Su)*

23 **S1. Adsorption of heavy metal ions by rGO and NHs in single metal system**

24 For single metal system, the adsorption capacities for Cd(II), Ni(II), Zn(II), Co(II), Pb(II),  
25 and Cu(II) on rGO, rGO/magnetite, rGO/silver, and rGO/magnetite/silver were compared (Fig.  
26 S1). Heavy metal ions were more easily adsorbed on rGO at pH 4 than that of iron- and elemental  
27 silver-deposited rGOs (*i.e.*, rGO/magnetite, rGO/silver, and rGO/magnetite/silver), according to  
28 following order: Cu(II) > Zn(II) > Ni(II) > Co(II) > Cd(II), Pb(II). The maximum pH at which  
29 metallic ions began to hydrolyze was calculated using the solubility product constant ( $K_{sp}$ ,  
30 summarized in Table S1) and metallic ion concentrations to ensure that only dissociated ions  
31 would be adsorbed. The  $K_{sp}$  value reflects the dissolvability of  $Me(OH)_2$  in water [1], as follows:

32

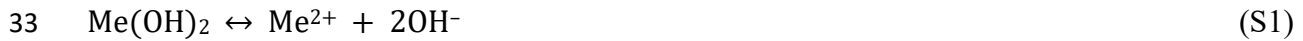

34

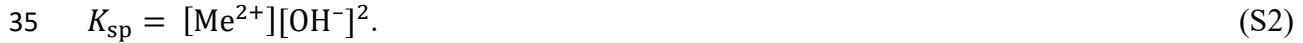

36

37 The calculated maximum pH values for Cd(II), Ni(II), Zn(II), Co(II), Pb(II), and Cu(II) were 6.78,  
38 6.87, 6.04, 7.39, 4.58, and 5.10, respectively. At pH levels below these maxima, the adsorption  
39 process can be achieved by complex formations with deprotonated sites of the rGO and NHs (Eq.  
40 (S3)), exchange with  $Na^+/H^+$  ions (Eqs. (S4) and (S5)), and hydrolysis of metal ions ( $Me^{2+}$ ) in  
41 solution ( $n > m$ ) (Eqs. (S6) and (S7)) [2].

42

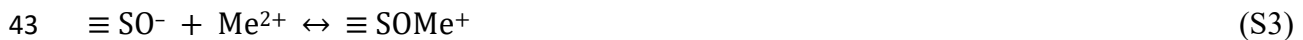

44

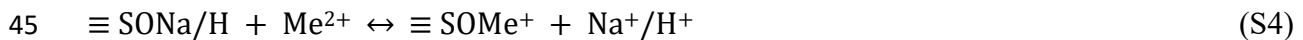

46

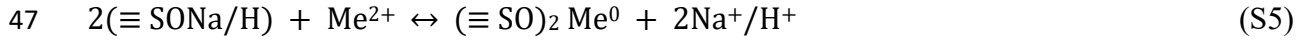

48

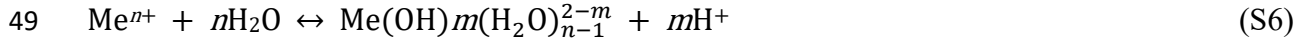

50

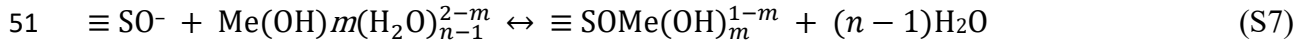

52

53 The physicochemical properties of metallic ions, such as electronegativity, ionic radius,  $K_{\text{sp}}$ , and  
54 hydrolysis constant ( $pK_{\text{h}}$ ), are responsible for the adsorption selectivity [3, 4]. The highest  
55 adsorption capacity of Cu(II) on rGO, rGO/magnetite, rGO/silver, and rGO/magnetite/silver  
56 (4.998, 4.203, 4.996, and 4.997 mmol/g, respectively) can be explained by a smallest ionic radius  
57 (0.73 Å) readily occupying the pores of the rGO and NHs despite the low solubility product of  
58 Cu(II) ion ( $1.6 \times 10^{-19}$ ).

59

60

61 **Table S1.** Hydrolysis constants ( $pK_h$ ), ionic radii, and solubility products ( $K_{sp}$ ) of the heavy metal  
 62 ions investigated in this study [3, 5, 6].

| Heavy metal ions       | Cd(II)                | Ni(II)                | Zn(II)                | Co(II)                | Pb(II)                | Cu(II)                |
|------------------------|-----------------------|-----------------------|-----------------------|-----------------------|-----------------------|-----------------------|
| $pK_h$                 | 10.80                 | 9.40                  | 8.96                  | 9.60                  | 7.71                  | 8.00                  |
| Ionic radius (Å)       | 0.95                  | 0.74                  | 0.75                  | 0.78                  | 1.21                  | 0.73                  |
| $K_{sp}$ of $Me(OH)_x$ | $7.2 \times 10^{-15}$ | $5.5 \times 10^{-16}$ | $1.2 \times 10^{-17}$ | $5.9 \times 10^{-15}$ | $1.4 \times 10^{-20}$ | $1.6 \times 10^{-19}$ |

63  
 64

65 **Table S2.** Parameters of the pseudo first-order and second-order kinetic models for Cd(II)  
 66 adsorption on rGO, rGO/magnetite, rGO/silver, and rGO/magnetite/silver NHs.

| Adsorbent            | Exp.                    | Pseudo-first-order kinetic model |                          |       | Pseudo-second-order kinetic model |                          |       |
|----------------------|-------------------------|----------------------------------|--------------------------|-------|-----------------------------------|--------------------------|-------|
|                      | $q_{e,exp}$<br>(mmol/g) | $k_1$<br>(1/min)                 | $q_{e,cal1}$<br>(mmol/g) | $r^2$ | $k_2$<br>(1/min)                  | $q_{e,cal2}$<br>(mmol/g) | $r^2$ |
| rGO                  | 3.769                   | 0.125                            | 3.835                    | 0.866 | 0.221                             | 3.811                    | 0.984 |
| rGO/magnetite        | 2.477                   | 0.070                            | 2.569                    | 0.945 | 0.171                             | 2.615                    | 0.982 |
| rGO/silver           | 3.208                   | 0.075                            | 3.322                    | 0.973 | 0.089                             | 3.427                    | 0.992 |
| rGO/magnetite/silver | 3.354                   | 0.101                            | 3.404                    | 0.864 | 0.209                             | 3.444                    | 0.973 |

67  
68

69 **Table S3.** Parameters of Langmuir and Freundlich isotherms for Cd(II) adsorption on rGO,  
 70 rGO/magnetite, rGO/silver, and rGO/magnetite/silver NHs.

| Adsorbent            | Langmuir isotherm model             |                   |       |                       | Freundlich isotherm model |       |       |                       |
|----------------------|-------------------------------------|-------------------|-------|-----------------------|---------------------------|-------|-------|-----------------------|
|                      | $q_e = \frac{q_m b C_e}{1 + b C_e}$ |                   |       |                       | $q_e = k_F C_e^n$         |       |       |                       |
|                      | $q_m$<br>(mmol/g)                   | $K_L$<br>(L/mmol) | $r^2$ | $\chi^2$              | $k_F$                     | $n$   | $r^2$ | $\chi^2$              |
| rGO                  | 3.854                               | 51.90             | 0.999 | $1.29 \times 10^{-2}$ | 3.778                     | 12.45 | 0.910 | $1.16 \times 10^{-0}$ |
| rGO/magnetite        | 2.605                               | 83.46             | 0.985 | $1.14 \times 10^{-1}$ | 2.709                     | 8.850 | 0.776 | $4.78 \times 10^{-1}$ |
| rGO/silver           | 3.317                               | 50.25             | 0.995 | $8.52 \times 10^{-2}$ | 3.396                     | 7.680 | 0.854 | $7.20 \times 10^{-1}$ |
| rGO/magnetite/silver | 3.441                               | 56.98             | 0.996 | $6.10 \times 10^{-2}$ | 3.477                     | 8.718 | 0.774 | $7.96 \times 10^{-1}$ |

71  
72

73 **Table S4.** Elemental content (%) of the rGO, rGO/magnetite, rGO/silver, and  
 74 rGO/magnetite/silver NHs before and after Cd(II) adsorption based on the XPS analyses.

| Element | Before Cd(II) adsorption |                   |                |                              | After Cd(II) adsorption |                   |                |                              |
|---------|--------------------------|-------------------|----------------|------------------------------|-------------------------|-------------------|----------------|------------------------------|
|         | rGO                      | rGO/<br>magnetite | rGO/<br>silver | rGO/<br>magnetite/<br>silver | rGO                     | rGO/<br>magnetite | rGO/<br>silver | rGO/<br>magnetite/<br>silver |
| C1s     | 80.56                    | 42.06             | 58.42          | 53.10                        | 77.83                   | 49.74             | 82.05          | 30.18                        |
| O1s     | 19.44                    | 52.55             | 14.91          | 40.10                        | 20.08                   | 41.17             | 9.06           | 54.42                        |
| Fe2p3   | -                        | 5.38              | -              | 5.23                         | -                       | 9.03              | -              | 14.44                        |
| Ag3d    | -                        | -                 | 26.67          | 1.56                         | -                       | -                 | 8.62           | 0.59                         |
| Cd3d5   | -                        | -                 | -              | -                            | 2.09                    | 0.05              | 0.27           | 0.38                         |

75  
76

77 **Table S5.** Influence of natural organic matters (Suwannee River humic and fulvic acids) on heavy  
 78 metal ion adsorption by rGO, rGO/magnetite, rGO/silver, and rGO/magnetite/silver NHs.

| Heavy metals | Adsorbent            | Adsorption capacity (mmol/g) |                           |                            | Percentage increase (%)   |                            |
|--------------|----------------------|------------------------------|---------------------------|----------------------------|---------------------------|----------------------------|
|              |                      | No NOM                       | Suwannee River humic acid | Suwannee River fulvic acid | Suwannee River humic acid | Suwannee River fulvic acid |
| Cd(II)       | rGO                  | 2.55                         | 3.16                      | 3.03                       | 23.79                     | 18.84                      |
|              | rGO/magnetite        | 1.91                         | 2.85                      | 2.85                       | 48.89                     | 48.76                      |
|              | rGO/silver           | 2.26                         | 2.86                      | 2.93                       | 26.91                     | 29.93                      |
|              | rGO/magnetite/silver | 2.52                         | 2.85                      | 2.91                       | 13.32                     | 15.38                      |
| Ni(II)       | rGO                  | 3.81                         | 3.95                      | 3.74                       | 3.54                      | -1.94                      |
|              | rGO/magnetite        | 2.32                         | 3.05                      | 3.16                       | 31.58                     | 36.33                      |
|              | rGO/silver           | 3.18                         | 3.48                      | 3.55                       | 9.45                      | 11.62                      |
|              | rGO/magnetite/silver | 3.80                         | 3.84                      | 3.95                       | 1.20                      | 4.09                       |
| Zn(II)       | rGO                  | 5.0                          | 5.0                       | 5.0                        | 0.0                       | 0.0                        |
|              | rGO/magnetite        | 3.11                         | 3.37                      | 3.48                       | 8.36                      | 11.90                      |
|              | rGO/silver           | 3.25                         | 3.76                      | 3.74                       | 15.69                     | 15.08                      |
|              | rGO/magnetite/silver | 4.15                         | 4.46                      | 4.33                       | 7.47                      | 4.34                       |
| Co(II)       | rGO                  | 2.96                         | 3.86                      | 3.16                       | 30.21                     | 6.76                       |
|              | rGO/magnetite        | 2.16                         | 2.99                      | 3.08                       | 38.69                     | 42.74                      |
|              | rGO/silver           | 2.92                         | 2.97                      | 3.21                       | 1.83                      | 9.95                       |
|              | rGO/magnetite/silver | 2.95                         | 3.11                      | 3.14                       | 5.47                      | 6.56                       |
| Pb(II)       | rGO                  | 2.76                         | 2.86                      | 3.15                       | 3.81                      | 14.20                      |
|              | rGO/magnetite        | 1.91                         | 2.88                      | 2.85                       | 51.09                     | 49.51                      |
|              | rGO/silver           | 2.50                         | 2.19                      | 2.97                       | -12.29                    | 18.85                      |
|              | rGO/magnetite/silver | 2.56                         | 2.66                      | 2.90                       | 3.98                      | 13.39                      |
| Cu(II)       | rGO                  | 5.0                          | 5.0                       | 5.0                        | 0.0                       | 0.0                        |
|              | rGO/magnetite        | 3.98                         | 4.12                      | 4.18                       | 3.52                      | 5.03                       |
|              | rGO/silver           | 5.0                          | 5.0                       | 5.0                        | 0.0                       | 0.0                        |
|              | rGO/magnetite/silver | 5.0                          | 5.0                       | 5.0                        | 0.0                       | 0.0                        |

79



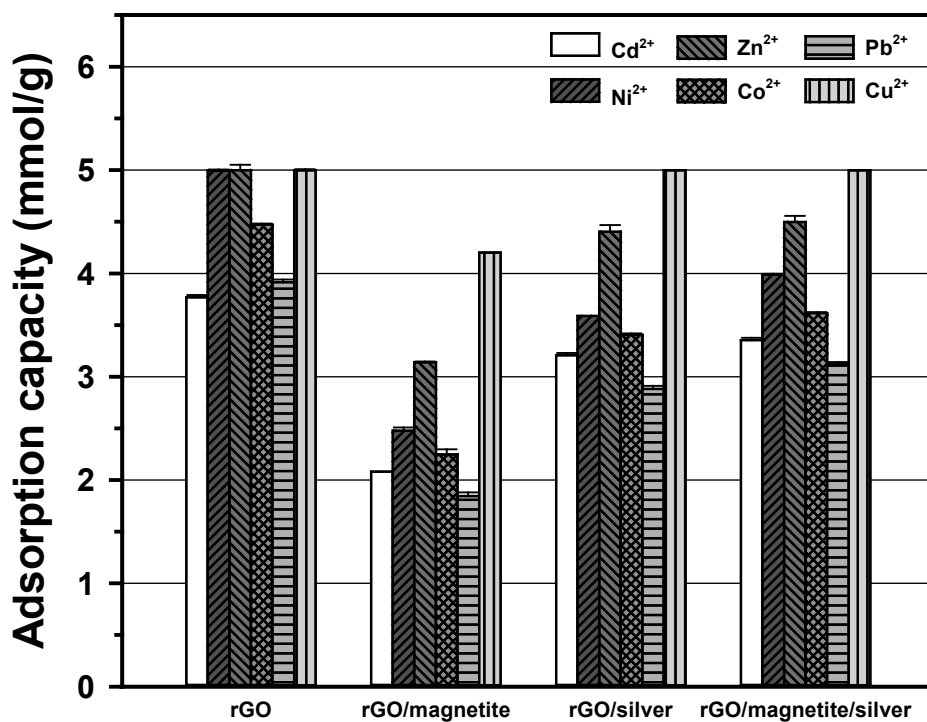

80

81 **Fig. S1.** Comparison of the adsorption capacity of Cd(II), Ni(II), Zn(II), Co(II), Pb(II), and Cu(II)  
 82 by rGO, rGO/magnetite, rGO/silver, and rGO/magnetite/silver nanohybrids. Experimental  
 83 conditions:  $m/V = 0.2$  g/L; initial pH =  $4.0 \pm 0.1$ ;  $[Cd(II)]_0 = [Ni(II)]_0 = [Zn(II)]_0 = [Co(II)]_0 =$   
 84  $[Pb(II)]_0 = [Cu(II)]_0 = 1$  mM;  $I = 0.01$  mol/L NaNO<sub>3</sub>; and  $T = 298$  K.  
 85

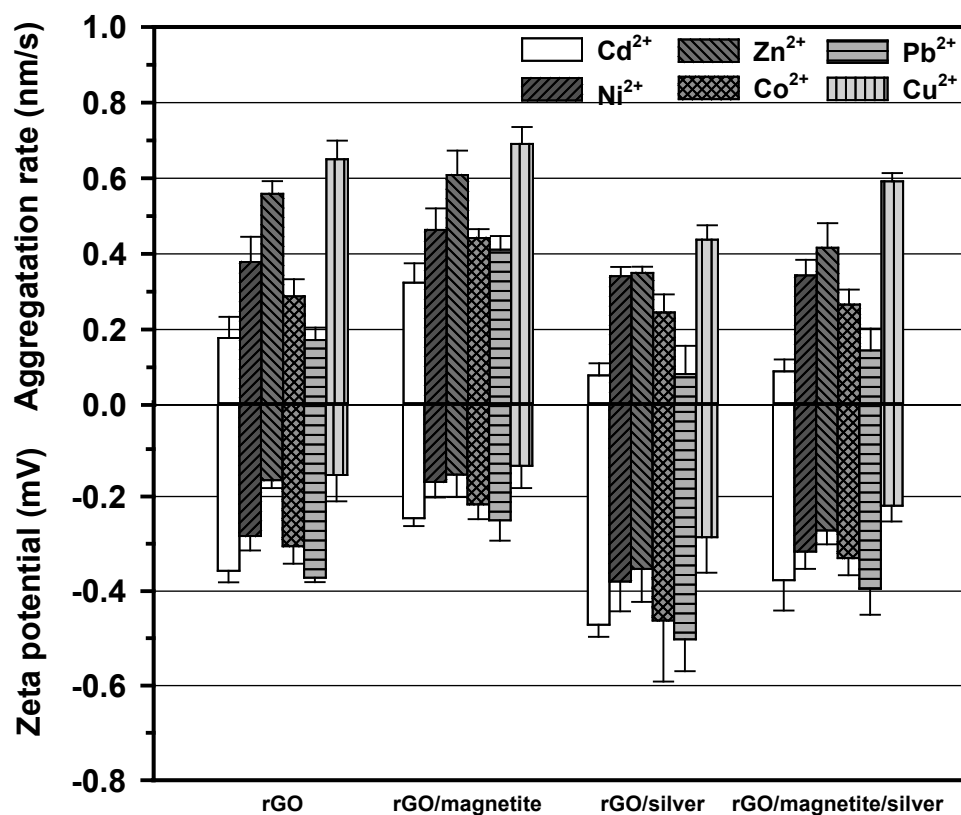

86

87 **Fig. S2.** Aggregation rate plots and zeta potentials of rGO, rGO/magnetite, rGO/silver, and  
 88 rGO/magnetite/silver nanohybrids with heavy metal ions. Experimental conditions:  $m/V = 0.2$  g/L;  
 89  $[Cd(II)]_0 = [Ni(II)]_0 = [Zn(II)]_0 = [Co(II)]_0 = [Pb(II)]_0 = [Cu(II)]_0 = 1$  mM; and  $T = 298$  K.

90

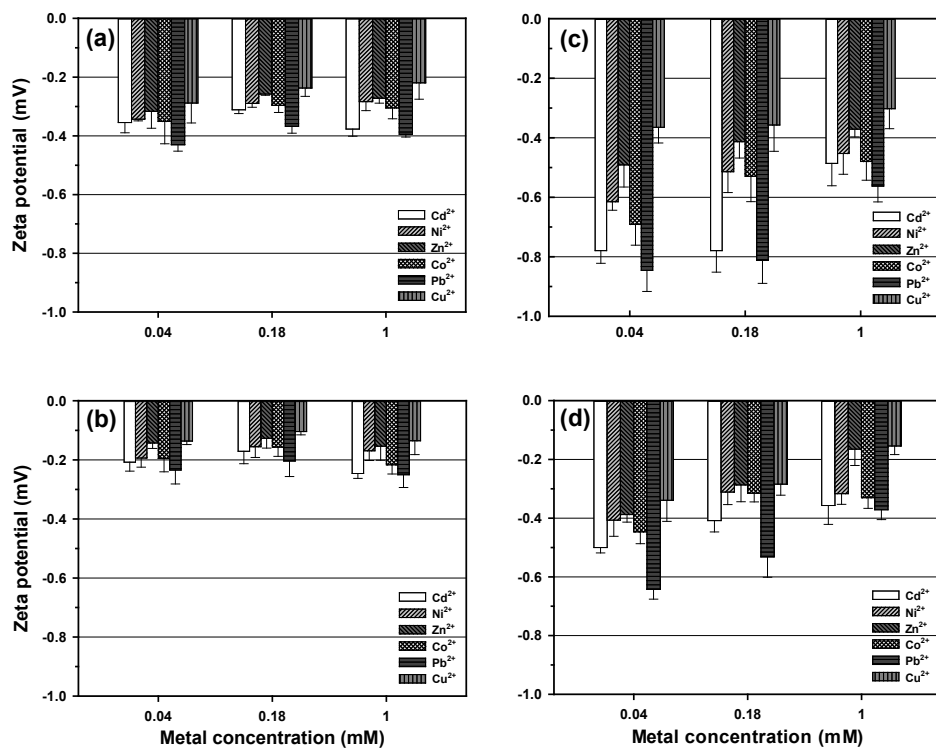

91

92 **Fig. S3.** Comparison of the zeta potential of (a) rGO, (b) rGO/magnetite, (c) rGO/silver, and (d)  
 93 rGO/magnetite/silver nanohybrids with heavy metal ions. Experimental conditions:  $m/V = 0.2$  g/L;  
 94  $[Cd(II)]_0 = [Ni(II)]_0 = [Zn(II)]_0 = [Co(II)]_0 = [Pb(II)]_0 = [Cu(II)]_0 = 0.04, 0.18,$  and  $1$  mM; and  $T =$   
 95  $298$  K.  
 96

97 **References**

98 [1] J.C. Rivière, S. Myhra, Handbook of surface and interface analysis: methods for problem-  
99 solving, CRC press, 2009.

100 [2] S. Yang, J. Hu, C. Chen, D. Shao, X. Wang, Mutual effects of Pb(II) and humic acid adsorption  
101 on multiwalled carbon nanotubes/polyacrylamide composites from aqueous solutions, Environ.  
102 Sci. Technol., 45 (2011) 3621-3627.

103 [3] Ö. Yavuz, Y. Altunkaynak, F. Güzel, Removal of copper, nickel, cobalt and manganese from  
104 aqueous solution by kaolinite, Water Res., 37 (2003) 948-952.

105 [4] A. Jang, Y. Seo, P.L. Bishop, The removal of heavy metals in urban runoff by sorption on  
106 mulch, Environ. Pollut., 133 (2005) 117-127.

107 [5] D. Yu, W. Jillek, E. Schmitt, Electrochemical migration of Sn-Pb and lead free solder alloys  
108 under distilled water, J. Mater. Sci. - Mater. Electron., 17 (2006) 219-227.

109 [6] D.R. Lide, CRC handbook of chemistry and physics, CRC Press/Taylor and Francis, Boca  
110 Raton, FL, 2012.

111

112
